# Supplementary material for: Genotypic analysis of the female BPH/5 mouse, a model of superimposed preeclampsia
Source: PLoS One. 2021 Jul 16;16(7):e0253453. doi: 10.1371/journal.pone.0253453 (PMC8284809; doi:10.1371/journal.pone.0253453)
Supplement: S3 Table — (XLS) [file pone.0253453.s003.xls]

## Sheet: analysis-3
Analysis Type:	PANTHER Overrepresentation Test (Released 20200728)
Annotation Version and Release Date:	GO Ontology database DOI: 10.5281/zenodo.4081749 Released 2020-10-09
Analyzed List:	upload_1 (Mus musculus)
Reference List:	Mus musculus (all genes in database)
Test Type:	FISHER
Correction:	FDR
GO biological process complete	Mus musculus - REFLIST (21988)	# of genes in uploaded list	expected based on size of input list	pos = enriched; neg=de-enriched	Fold Enrichment	raw P-value	FDR correction
phagocytosis, recognition (GO:0006910)	203	109	36.41	+	2.99	4.79e-18	7.57e-14	13.1209
complement activation, classical pathway (GO:0006958)	216	112	38.74	+	2.89	1.04e-17	8.23e-14	13.0846
phagocytosis, engulfment (GO:0006911)	231	116	41.43	+	2.8	2.35e-17	1.24e-13	12.9066
plasma membrane invagination (GO:0099024)	240	118	43.05	+	2.74	4.18e-17	1.32e-13	12.8794
membrane invagination (GO:0010324)	246	119	44.13	+	2.7	5.56e-17	1.46e-13	12.8356
humoral immune response mediated by circulating immunoglobulin (GO:0002455)	221	112	39.64	+	2.83	3.95e-17	1.56e-13	12.8069
complement activation (GO:0006956)	228	113	40.9	+	2.76	1.02e-16	2.3e-13	12.6383
B cell receptor signaling pathway (GO:0050853)	220	108	39.46	+	2.74	7.9e-16	1.56e-12	11.8069
activation of immune response (GO:0002253)	404	159	72.47	+	2.19	1.68e-15	2.95e-12	11.5302
immune response-regulating cell surface receptor signaling pathway (GO:0002768)	342	141	61.34	+	2.3	3.18e-15	5.02e-12	11.2993
immune response-activating signal transduction (GO:0002757)	331	137	59.37	+	2.31	5.91e-15	7.17e-12	11.1445
immune response-regulating signaling pathway (GO:0002764)	345	141	61.88	+	2.28	6.44e-15	7.26e-12	11.1391
immune response-activating cell surface receptor signaling pathway (GO:0002429)	330	137	59.19	+	2.31	5.26e-15	7.55e-12	11.1221
immunoglobulin mediated immune response (GO:0016064)	267	119	47.89	+	2.48	5.9e-15	7.76e-12	11.1101
B cell mediated immunity (GO:0019724)	271	120	48.61	+	2.47	7.81e-15	8.22e-12	11.0851
phagocytosis (GO:0006909)	333	136	59.73	+	2.28	1.8e-14	1.77e-11	10.752
defense response to bacterium (GO:0042742)	497	177	89.15	+	1.99	7.43e-14	6.89e-11	10.1618
antigen receptor-mediated signaling pathway (GO:0050851)	306	126	54.89	+	2.3	1.06e-13	9.3e-11	10.0315
lymphocyte mediated immunity (GO:0002449)	321	130	57.58	+	2.26	1.27e-13	1.06e-10	9.97469
positive regulation of immune response (GO:0050778)	667	216	119.64	+	1.81	2.75e-13	2.17e-10	9.66354
positive regulation of B cell activation (GO:0050871)	271	114	48.61	+	2.35	5.25e-13	3.94e-10	9.4045
humoral immune response (GO:0006959)	423	153	75.87	+	2.02	1.09e-12	7.81e-10	9.10735
adaptive immune response based on somatic recombination of immune receptors built from immunoglobulin superfamily domains (GO:0002460)	342	130	61.34	+	2.12	3.73e-12	2.56e-09	8.59176
production of molecular mediator of immune response (GO:0002440)	292	9	52.38	-	0.17	4.15e-12	2.73e-09	8.56384
regulation of B cell activation (GO:0050864)	319	124	57.22	+	2.17	4.64e-12	2.93e-09	8.53313
leukocyte mediated immunity (GO:0002443)	360	134	64.57	+	2.08	6.78e-12	4.12e-09	8.3851
immunoglobulin production (GO:0002377)	263	7	47.17	-	0.15	9.45e-12	5.52e-09	8.25806
cell recognition (GO:0008037)	324	124	58.12	+	2.13	1.01e-11	5.69e-09	8.24489
innate immune response (GO:0045087)	833	246	149.42	+	1.65	1.98e-11	1.08e-08	7.96658
regulation of immune response (GO:0050776)	863	250	154.8	+	1.62	7.04e-11	3.71e-08	7.43063
adaptive immune response (GO:0002250)	489	160	87.71	+	1.82	2e-10	1.02e-07	6.9914
endocytosis (GO:0006897)	555	174	99.55	+	1.75	5.09e-10	2.51e-07	6.60033
positive regulation of lymphocyte activation (GO:0051251)	464	148	83.23	+	1.78	4.71e-09	2.25e-06	5.64782
immune effector process (GO:0002252)	659	193	118.21	+	1.63	4.99e-09	2.25e-06	5.64782
defense response to other organism (GO:0098542)	1068	284	191.57	+	1.48	4.84e-09	2.25e-06	5.64782
positive regulation of leukocyte activation (GO:0002696)	526	160	94.35	+	1.7	1.69e-08	7.41e-06	5.13018
positive regulation of cell activation (GO:0050867)	541	163	97.04	+	1.68	1.9e-08	8.1e-06	5.09151
positive regulation of immune system process (GO:0002684)	1023	269	183.5	+	1.47	3.03e-08	1.26e-05	4.89963
regulation of lymphocyte activation (GO:0051249)	629	179	112.82	+	1.59	1.15e-07	4.66e-05	4.33161
defense response (GO:0006952)	1441	347	258.47	+	1.34	7.13e-07	0.000281	3.55129
response to bacterium (GO:0009617)	874	227	156.77	+	1.45	9.42e-07	0.000363	3.44009
regulation of leukocyte activation (GO:0002694)	737	196	132.2	+	1.48	1.59e-06	0.000599	3.22257
regulation of immune system process (GO:0002682)	1485	351	266.37	+	1.32	2.69e-06	0.000986	3.00612
regulation of cell activation (GO:0050865)	782	204	140.27	+	1.45	2.99e-06	0.00107	2.97062
response to other organism (GO:0051707)	1422	337	255.06	+	1.32	3.35e-06	0.00117	2.93181
response to external biotic stimulus (GO:0043207)	1424	337	255.42	+	1.32	3.97e-06	0.00136	2.86646
response to biotic stimulus (GO:0009607)	1454	343	260.8	+	1.32	4.15e-06	0.00136	2.86646
membrane organization (GO:0061024)	789	204	141.52	+	1.44	4.11e-06	0.00138	2.86012
antigen processing and presentation of peptide antigen via MHC class I (GO:0002474)	51	28	9.15	+	3.06	9.48e-06	0.00305	2.5157
antigen processing and presentation of endogenous peptide antigen via MHC class I (GO:0019885)	41	24	7.35	+	3.26	1.47e-05	0.00454	2.34294
antigen processing and presentation of endogenous peptide antigen (GO:0002483)	41	24	7.35	+	3.26	1.47e-05	0.00463	2.33442
positive regulation of nitrogen compound metabolic process (GO:0051173)	3048	448	546.72	-	0.82	1.66e-05	0.00505	2.29671
antigen processing and presentation of peptide antigen via MHC class Ib (GO:0002428)	36	22	6.46	+	3.41	2.02e-05	0.00601	2.22113
antigen processing and presentation of endogenous peptide antigen via MHC class Ib (GO:0002476)	35	21	6.28	+	3.35	3.78e-05	0.0107	1.97062
antigen processing and presentation of endogenous peptide antigen via MHC class I via ER pathway (GO:0002484)	35	21	6.28	+	3.35	3.78e-05	0.0108	1.96658
response to hormone (GO:0009725)	567	60	101.7	-	0.59	3.7e-05	0.0108	1.96658
antigen processing and presentation of endogenous antigen (GO:0019883)	44	24	7.89	+	3.04	4.81e-05	0.0133	1.87615
antigen processing and presentation of peptide antigen (GO:0048002)	69	31	12.38	+	2.5	6.35e-05	0.0173	1.76195
interspecies interaction between organisms (GO:0044419)	1578	356	283.05	+	1.26	6.73e-05	0.018	1.74473
antigen processing and presentation of endogenous peptide antigen via MHC class I via ER pathway, TAP-independent (GO:0002486)	34	20	6.1	+	3.28	7.05e-05	0.0186	1.73049
antigen processing and presentation via MHC class Ib (GO:0002475)	40	22	7.17	+	3.07	0.000102	0.026	1.58503
positive regulation of cellular metabolic process (GO:0031325)	3256	492	584.03	-	0.84	0.000102	0.0263	1.58004
positive regulation of transcription by RNA polymerase II (GO:0045944)	1211	160	217.22	-	0.74	0.000128	0.032	1.49485
cell surface receptor signaling pathway (GO:0007166)	1896	414	340.09	+	1.22	0.000187	0.0462	1.33536
